# Supplementary material for: Network Pharmacology and Metabolomics Studies on Antimigraine Mechanisms of Da Chuan Xiong Fang (DCXF)
Source: Evid Based Complement Alternat Med. 2021 Apr 20;2021:6665137. doi: 10.1155/2021/6665137 (PMC8081595; doi:10.1155/2021/6665137)
Supplement: Supplementary Materials — Supplementary S1: preparation, quality control, and HPLC of DCXF, GE, and LC. Supplementary S2: ingredients from LC and GE. Supplementary S3: QED results of GE and LC. Supplementary S4: 531 core targets. Supplementary S5: migraine genes. Supplementary S6: ARRIVE statement for animal experiments. Supplementary S7: metabolites of serum of brain tissue. Supplementary S8: all active ingredients molecular docking results. Supplementary S9: results of MCODE. Supplementary S10: effect of DCXF on serum and brain tissue metabolic profiling. Supplementary S11: gene-metabolite interaction network. Supplementary S12: GTEx RNA-seq data to verify the expression of hub genes in the brain tissues. [file 6665137.f1.zip]

Archive with 12 entries (12 files):
- 6665137.f1/Supplementary S10 Effect of DCXF on serum and brai.docx
- 6665137.f1/Supplementary S11 Gene-Metabolite Interaction Network.docx
- 6665137.f1/Supplementary S2 Ingredients from LC and GE.docx
- 6665137.f1/Supplementary S3 QED results of GE and LC.docx
- 6665137.f1/Supplementary S4 531 core targets.docx
- 6665137.f1/Supplementary S5 Migraine genes.docx
- 6665137.f1/Supplementary S6 ARRIVE Statement for Animal Experiments (1).docx
- 6665137.f1/Supplementary S7 Metabolites of serum of brain tissue (1).docx
- 6665137.f1/Supplementary S8 All active ingredients molecular.docx
- 6665137.f1/Supplementary S9 Results of MCODE.docx
- 6665137.f1/Supplenmentary S1 Preparation,Quality control and HPLC figure of DCXF, GE, and LC (1).doc
- 6665137.f1/Supplenmentary S12GTEx RNA-seq data to verify the expression of hub genes in the brain tissues (1).docx
